# Supplementary material for: Short-range interactions between fibrocytes and CD8+ T cells in COPD bronchial inflammatory response
Source: eLife. 2023 Jul 26;12:RP85875. doi: 10.7554/eLife.85875 (PMC10371228; doi:10.7554/eLife.85875)
Supplement: Supplementary file 5. — FEV1, forced expiratory volume in 1 s; FVC, forced vital capacity; LFT, lung function test; RV, residual volume; TLCO, Transfer Lung capacity of Carbon monoxide, PaO2, partial arterial oxygen pressure, PaCO2, partial arterial carbon dioxide pressure; WA, mean wall area; LA, mean lumen area, WA%, mean wall area percentage; WT, wall thickness; LAA, low-attenuation area; MLA E or I, mean lung attenuation value during expiration or inspiration. MLA I-E, the difference between inspiratory and expiratory mean lung attenuation value. %CSA<5, percentage of total lung area taken up by the cross-sectional area of pulmonary vessels less than 5 mm2; %CSA5–10, percentage of total lung area taken up by the cross-sectional area of pulmonary vessels between 5 and 10 mm2; CSN<5, number of vessels less than 5 mm2 normalized by total lung area; CSN5-10, number of vessels between 5 and 10 mm2 normalized by total lung area; NR: not relevant. The correlation coefficient (r), 95% confidence interval, and significance level (p value), were obtained by using nonparametric Spearman analysis. [file elife-85875-supp5.docx]

**Supplementary file 5. Association between the density of mixed cell clusters and clinical characteristics**

|  |  |  | **Density of mixed cell clusters** | | | |
| --- | --- | --- | --- | --- | --- | --- |
|  |  | **Spearman r** | | **95% confidence interval** | **P value** | |
| Age (yrs.) | | 0,03 | | [-0.34 to 0.39] | 0,88 | |
| Body-mass index (kg/m2)  Pack years (no.)  **LFT**  FEV1 (% pred.)  FEV1/FVC ratio (%)  FVC (% pred.)  RV (% pred.)  TLCO (% pred.)  **Six-minute walk test distance (m)**  **Arterial blood gases**  PaO2 (mm Hg)  PaCO2 (mm Hg)  **CT parameters**  Bronchi:  WA4%  WT4 (mm)  WA5%  WT5 (mm)  Emphysema:  LAA (%)  Air trapping:  MLA E (HU)  MLA I (HU)  MLA I-E (HU)  Pulmonary Vessels  %CSA<5  %CSA5-10  CSN<5  CSN5-10 | | -0,02  0,23  -0,39  -0,36  -0,35  - 0,29  -0,48  0,11  0,21  0,33  0,14  0,13  0,24  0,32  0,30  -0,22  -0,38  0,11  -0,25  -0,28  -0,20  -0,39 | | [-0.38 to 0.35]  [-0.16 to 0.55]  [-0.66 to -0.03]  [-0.65 to 0.009]  [-0.63 to 0.02]  [-0.08 to 0.59]  [-0.73 to -0.12]  [-0.33 to 0.51]  [-0.18 to 0.54]  [-0.06 to 0.62]  [-0.29 to 0.51]  [-0.29 to 0.51]  [-0.19 to 0.59]  [-0.09 to 0.64]  [-0.09 to 0.61]  [-0.59 to 0.22]  [-0.66 to 0.006]  [-0.32 to 0.51  [-0.58 to 0.13]  [-0.59 to 0.11]  [-0.54 to 0.19]  [-0.66 to -0.01] | 0,93  0,24  **0,03**  **0,04**  0,057  0,11  **0,008**  0,62  0,28  0,08  0,52  0,54  0,25  0,12  0,12  0,30  **0,047**  0,60  0,18  0,15  0,29  **0,04** | |
|  | |  |  | | |
