# Supplementary material for: Short-range interactions between fibrocytes and CD8+ T cells in COPD bronchial inflammatory response
Source: eLife. 2023 Jul 26;12:RP85875. doi: 10.7554/eLife.85875 (PMC10371228; doi:10.7554/eLife.85875)
Supplement: Supplementary file 11. [file elife-85875-supp11.docx]

**Supplementary file 11**. Numerical values of parameters depending in control and COPD situations

| **Symbol** | **Numerical values** | |
| --- | --- | --- |
| **Control** | **COPD** |
|  | 7 µm | |
|  | 118 cells | |
|  | 19 cells | |
|  | 4.8.10-6 | 2.4.10-6 |
|  | 1.10-4 | 5.10-5 |
|  | 4.10-4 | 2.10-4 |
| σ | 3 | |
|  | 0 | |
|  | 5.10-5 | |
|  | 2.10-4 | |
| λ | 3 | |
|  | 10-3 | |
|  | 10-3 | |
|  | 9.12.10-5 | |
|  | 1.40.10-2 | |
|  | 0 | 2.20.10-3 |
|  | 0 | |
|  | 0 | 1 |
|  | 0 | |
